# Supplementary material for: Monolayer MoS2 Bandgap Modulation by Dielectric Environments and Tunable Bandgap Transistors
Source: PubMed Central journal article supplement (PMC4932597; doi:10.1038/srep29184), 2016-07-05
Supplement: srep29184-s1.pdf [file srep29184-s1.pdf]

# Supplementary Information

## Monolayer MoS<sub>2</sub> Bandgap Modulation by Dielectric Environments and Tunable Bandgap Transistors

Junga Ryou<sup>1</sup>, Yong-Sung Kim<sup>1,2,\*</sup>, Santosh KC<sup>3</sup> & Kyeongjae Cho<sup>3,\*</sup>

<sup>1</sup>Korea Research Institute of Standards and Science, Daejeon 305-340, Korea

<sup>2</sup>Department of Nano Science, University of Science and Technology, Daejeon 305-350, Korea

<sup>3</sup>Department of Materials Science and Engineering, University of Texas at Dallas, Richardson, TX 75080, USA

\* Correspondence to: Y.S.K. (email: yongsung.kim@kriss.re.kr); K.C. (email: kjcho@utdallas.edu).

## **Methods: GW Calculations with Effective Environmental Dielectric Screening**

Based on classical electrostatics, the Poisson equation governing an inhomogeneous dielectric system is

$$\nabla \cdot [\varepsilon^M(\mathbf{r})\nabla V(\mathbf{r})] = -4\pi\rho(\mathbf{r}), \quad (1)$$

where  $\rho(\mathbf{r})$  is the charge density,  $V(\mathbf{r})$  is the electrostatic potential, and  $\varepsilon^M(\mathbf{r})$  is the spatially varying macroscopic dielectric constant. In a periodic system with the lattice vector,  $\mathbf{R}$ , the Fourier transform of Eq. (1) is

$$\sum_{\mathbf{G}'} \varepsilon_{\mathbf{G}-\mathbf{G}'}^M \mathbf{G} \cdot \mathbf{G}' V_{\mathbf{G}'} = 4\pi\rho_{\mathbf{G}}, \quad (2)$$

where  $\mathbf{G}$  and  $\mathbf{G}'$  are the reciprocal lattice vectors. The Eq. 2 can be rewritten as

$$\sum_{\mathbf{G}'} \varepsilon_{\mathbf{G}\mathbf{G}'}^M V_{\mathbf{G}'} = 4\pi\rho_{\mathbf{G}}/G^2, \quad (3)$$

$$\varepsilon_{\mathbf{G}\mathbf{G}'}^M \equiv \varepsilon_{\mathbf{G}-\mathbf{G}'}^M \mathbf{G} \cdot \mathbf{G}' / G^2. \quad (4)$$

Here, we define the macroscopic static dielectric matrix,  $\varepsilon_{\mathbf{G}\mathbf{G}'}^M$ . On the other hand, the static dielectric matrix  $\varepsilon_{\mathbf{G}\mathbf{G}'}(\mathbf{q}; 0)$  of a system in vacuum is related to its static polarizability  $\chi_{\mathbf{G}\mathbf{G}'}(\mathbf{q}; 0)$  as

$$\varepsilon_{\mathbf{G}\mathbf{G}'}(\mathbf{q}; 0) = \delta_{\mathbf{G}\mathbf{G}'} - v(\mathbf{q} + \mathbf{G})\chi_{\mathbf{G}\mathbf{G}'}(\mathbf{q}; 0), \quad (5)$$

where  $v(\mathbf{q} + \mathbf{G})$  is the bare Coulomb interaction. When the system is nearby a dielectric media, the additional screening by the dielectrics can be approximated by the macroscopic dielectric polarizability,  $\chi_{\mathbf{G}\mathbf{G}'}^M(\mathbf{q}; 0)$ .  $\chi_{\mathbf{G}\mathbf{G}'}^M(\mathbf{q}; 0)$  is then added to the static polarizability  $\chi_{\mathbf{G}\mathbf{G}'}(\mathbf{q}; 0)$  of the main system of interest:

$$\varepsilon_{\mathbf{G}\mathbf{G}'}(\mathbf{q}; 0) = \delta_{\mathbf{G}\mathbf{G}'} - v(\mathbf{q} + \mathbf{G})\{\chi_{\mathbf{G}\mathbf{G}'}(\mathbf{q}; 0) + \chi_{\mathbf{G}\mathbf{G}'}^M(\mathbf{q}; 0)\} \quad (6)$$

$$= \varepsilon_{\mathbf{G}\mathbf{G}'}^M(\mathbf{q}; 0) - v(\mathbf{q} + \mathbf{G})\chi_{\mathbf{G}\mathbf{G}'}(\mathbf{q}; 0). \quad (7)$$

In Eq. 7, the only difference from the static dielectric matrix of Eq. 5 is  $\varepsilon_{\mathbf{G}\mathbf{G}'}^{\mathbf{M}}(\mathbf{q}; 0)$  instead of  $\delta_{\mathbf{G}\mathbf{G}'}$ , which represents that the vacuum is replaced by the dielectric media where the system is located. The  $\varepsilon_{\mathbf{G}\mathbf{G}'}^{\mathbf{M}}(\mathbf{q}; 0)$  can be obtained from Eq. 4 for the  $|\mathbf{q}\rangle$  electronic state as

$$\begin{aligned}\varepsilon_{\mathbf{G}\mathbf{G}'}^{\mathbf{M}}(\mathbf{q}; 0) &= \varepsilon_{\mathbf{q}+\mathbf{G}, \mathbf{q}+\mathbf{G}'}^{\mathbf{M}} \\ &= \varepsilon_{\mathbf{G}-\mathbf{G}'}^{\mathbf{M}}(\mathbf{q} + \mathbf{G}) \cdot (\mathbf{q} + \mathbf{G}') / |\mathbf{q} + \mathbf{G}|^2.\end{aligned}\quad (8)$$

The real-space macroscopic dielectric constant profiles  $[\varepsilon^{\mathbf{M}}(\mathbf{r})]$  along the perpendicular direction to the ML MoS<sub>2</sub> are shown in Fig. S1 for the model structures of (a) the ML MoS<sub>2</sub> with one-side HfO<sub>2</sub>, (b) the ML MoS<sub>2</sub> with both-side HfO<sub>2</sub>, (c) the ML MoS<sub>2</sub> with one-side Au, and (d) the ML MoS<sub>2</sub> with both-side Au. The dielectric interfaces are chosen to be the top- and bottom-most atomic plane of the HfO<sub>2</sub> and Au slabs. At the interfaces, the dielectric profiles were smoothed with the error functions ( $\beta=0.2 \text{ \AA}$ ).

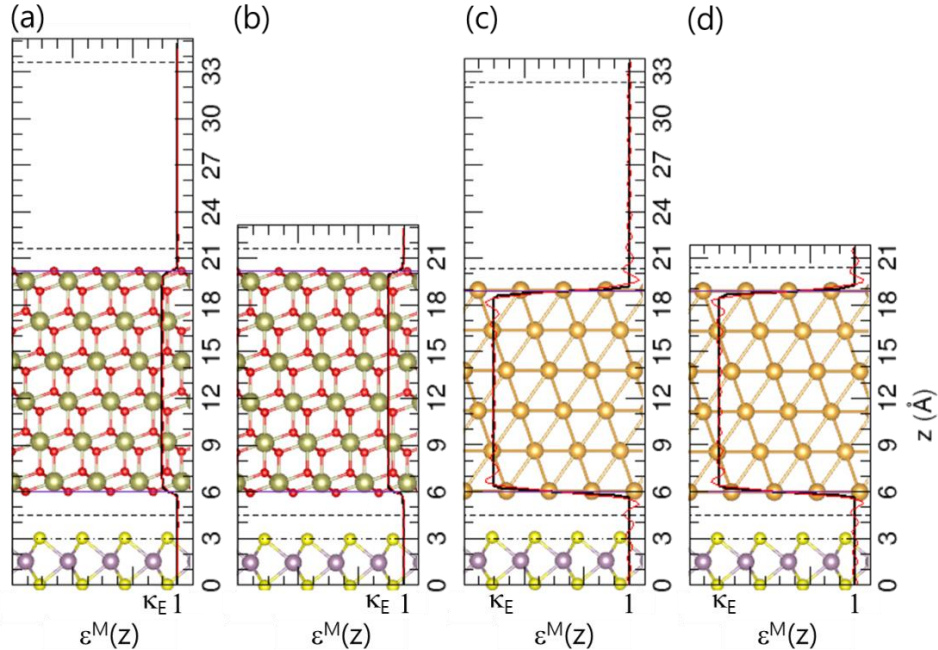

**Figure S1. Real-space environmental dielectric constant profiles.** (a-d) The dielectric constant profiles along the perpendicular direction to the ML MoS<sub>2</sub> for (a) the ML MoS<sub>2</sub> with

one-side HfO<sub>2</sub>, (b) the ML MoS<sub>2</sub> with both-side HfO<sub>2</sub>, (c) the ML MoS<sub>2</sub> with one-side Au, and (d) the ML MoS<sub>2</sub> with both-side Au.
